# Supplementary material
Source: Springer Nature journal article supplement (https://www.springermedizin.de/resource/supplementary/12879_2007_497_MOESM3_ESM.pdf/9449064)

Distance 0.1

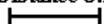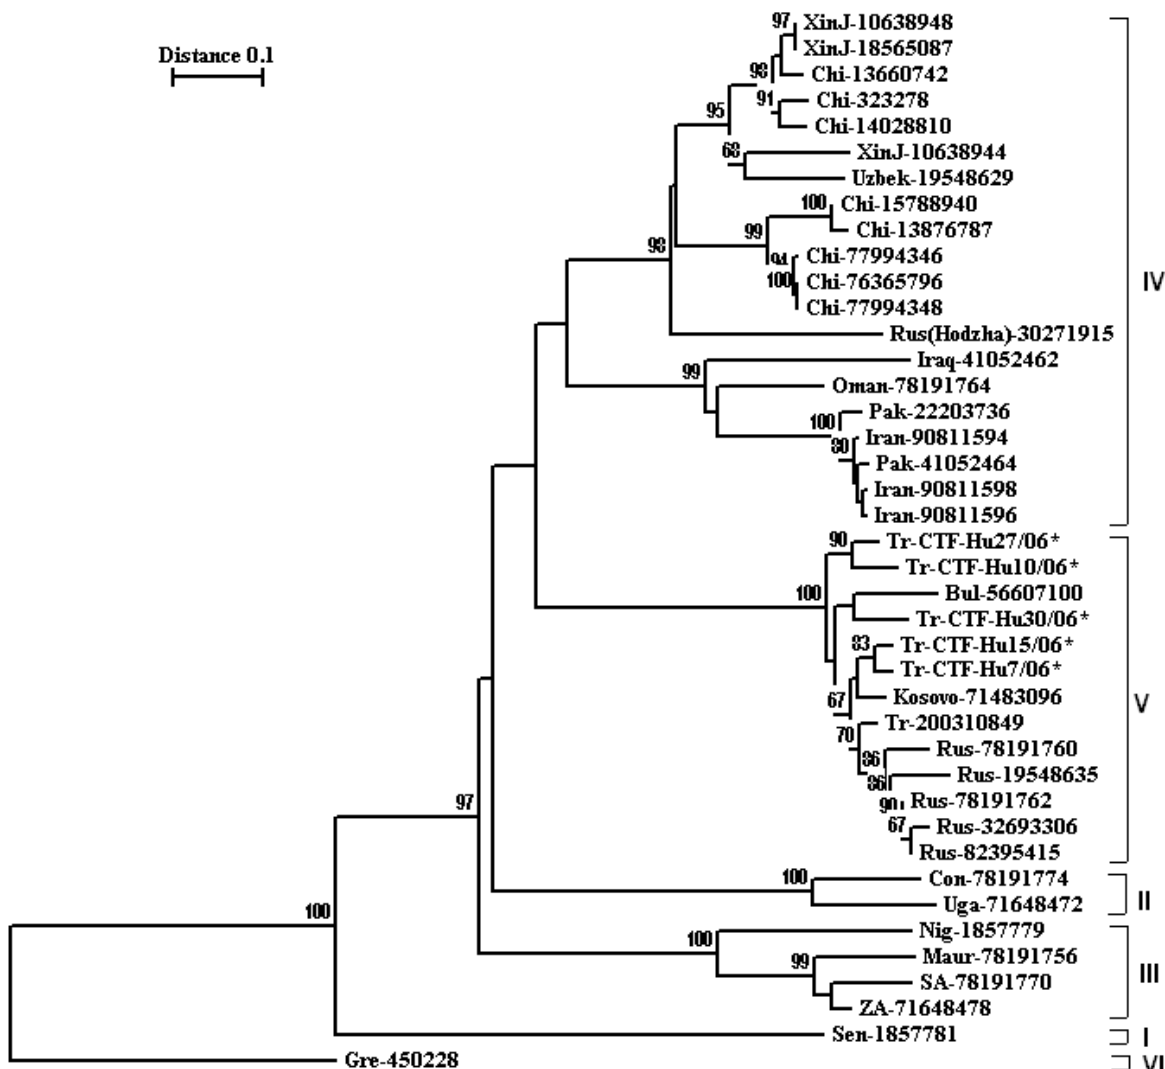

Supplement: MOESM3 [file 9449064]
